# Supplementary material for: Long-range surface plasmon resonance and surface-enhanced Raman scattering on X-shaped gold plasmonic nanohole arrays
Source: Royal Society of Chemistry journal article supplement (doi:10.1039/c7cp04564f), 2017-01-01
Supplement: c7cp04564f2.pdf [file c7cp04564f2.pdf]

**Video S1** The FDTD simulation videos show the broadband time domain variation for the optimal structure (540-80-585-200), where the left video shows the variation of electric field at the cross-sectional x-z plane, the right top video shows the variation at the top Au/water interface, and the right bottom one shows the variation at the bottom thick Au/Cytop interface.
